# Supplementary material
Source: publisher figshare collection journal article supplement (https://diabetesjournals.figshare.com/articles/dataset/_/12053640)

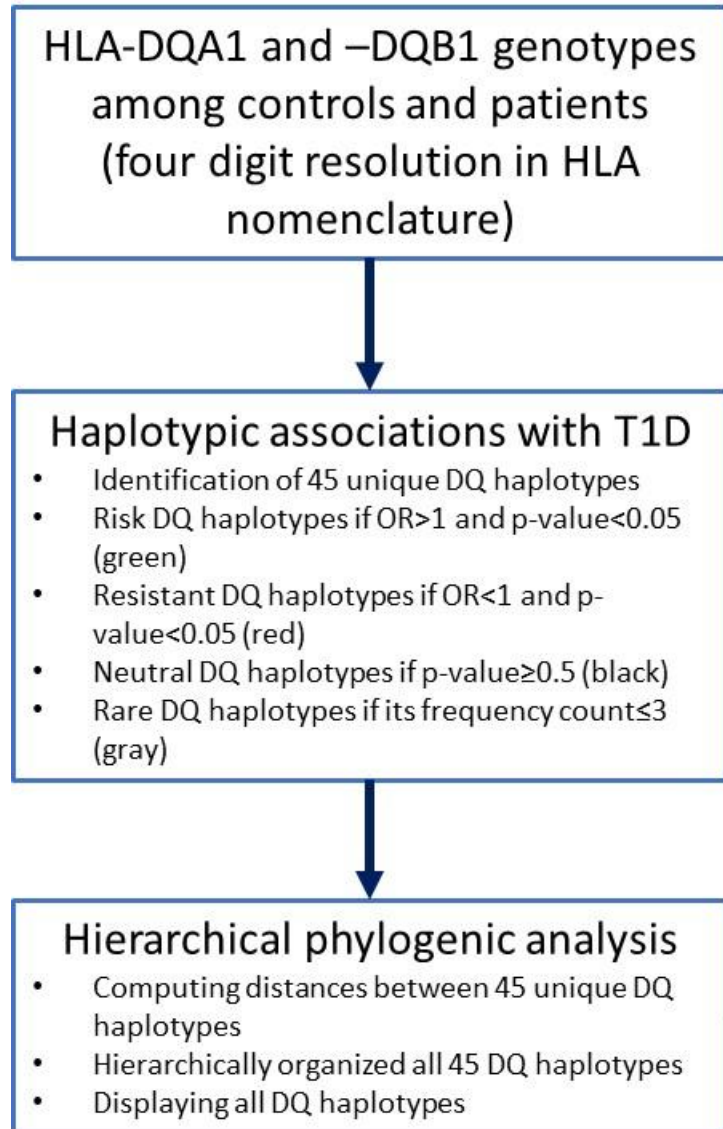

Figure S1. A flowchart to describe the hierarchically-organized haplotype (HOH) association analysis process, from hierarchical cluster analysis of residues to association analysis through haplotyping residues and cluster membership.

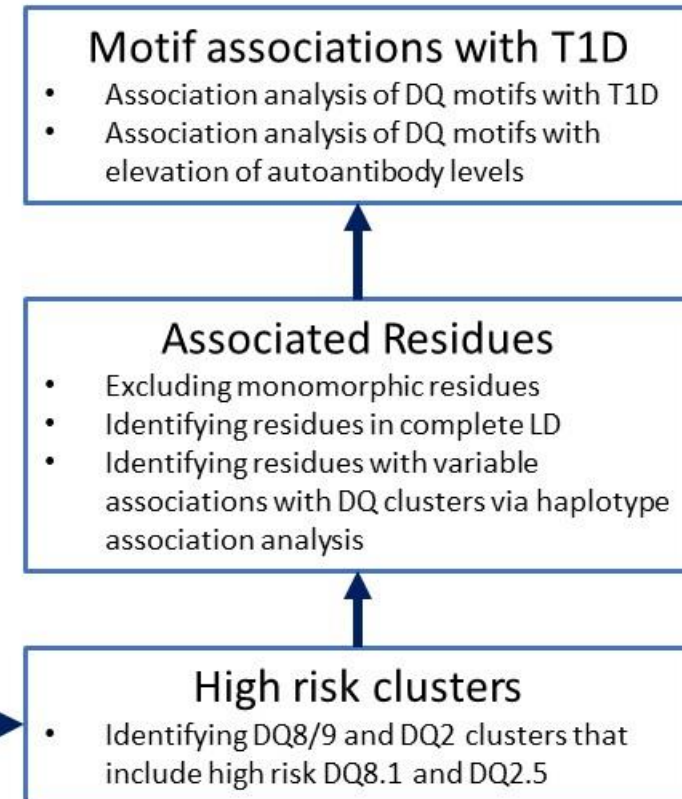

Supplement: Supplementary file 1 [file 1]
