# Supplementary material
Source: publisher figshare collection journal article supplement (https://diabetesjournals.figshare.com/articles/dataset/_/12053640)
Supplement: Supplementary file 2 [file 1]

Table S1. These thirteen residues are in complete LD with each other, and hence identical frequency distributions and association results.

|    |              |   | Control <sup>1</sup> | Patient <sup>1</sup> | OR   | Z     | p        | Fisher's |
|----|--------------|---|----------------------|----------------------|------|-------|----------|----------|
| 1  | $\alpha$ 31  | E | 78 (6.13)            | 47 (2.44)            | 0.40 | -5.20 | 2.00E-07 | 4.24E-16 |
|    |              | Q | 153 (12.03)          | 485 (25.21)          | 2.10 | 9.26  | 1.96E-20 |          |
| 2  | $\alpha$ 37  | E | 78 (6.13)            | 47 (2.44)            | 0.40 | -5.20 | 2.00E-07 | 4.24E-16 |
|    |              | G | 153 (12.03)          | 485 (25.21)          | 2.10 | 9.26  | 1.96E-20 |          |
| 3  | $\alpha$ 47  | L | 78 (6.13)            | 47 (2.44)            | 0.40 | -5.20 | 2.00E-07 | 4.24E-16 |
|    |              | V | 153 (12.03)          | 485 (25.21)          | 2.10 | 9.26  | 1.96E-20 |          |
| 4  | $\alpha$ 48  | F | 78 (6.13)            | 47 (2.44)            | 0.40 | -5.20 | 2.00E-07 | 4.24E-16 |
|    |              | L | 153 (12.03)          | 485 (25.21)          | 2.10 | 9.26  | 1.96E-20 |          |
| 5  | $\alpha$ 50  | Q | 153 (12.03)          | 485 (25.21)          | 2.10 | 9.26  | 1.96E-20 | 4.24E-16 |
|    |              | R | 78 (6.13)            | 47 (2.44)            | 0.40 | -5.20 | 2.00E-07 |          |
| 6  | $\alpha$ 72  | I | 78 (6.13)            | 47 (2.44)            | 0.40 | -5.20 | 2.00E-07 | 4.24E-16 |
|    |              | S | 153 (12.03)          | 485 (25.21)          | 2.10 | 9.26  | 1.96E-20 |          |
| 7  | $\alpha$ 104 | I | 153 (12.03)          | 485 (25.21)          | 2.10 | 9.26  | 1.96E-20 | 4.24E-16 |
|    |              | T | 78 (6.13)            | 47 (2.44)            | 0.40 | -5.20 | 2.00E-07 |          |
| 8  | $\alpha$ 153 | F | 78 (6.13)            | 47 (2.44)            | 0.40 | -5.20 | 2.00E-07 | 4.24E-16 |
|    |              | L | 153 (12.03)          | 485 (25.21)          | 2.10 | 9.26  | 1.96E-20 |          |
| 9  | $\alpha$ 158 | D | 78 (6.13)            | 47 (2.44)            | 0.40 | -5.20 | 2.00E-07 | 4.24E-16 |
|    |              | E | 153 (12.03)          | 485 (25.21)          | 2.10 | 9.26  | 1.96E-20 |          |
| 10 | $\alpha$ 160 | I | 78 (6.13)            | 47 (2.44)            | 0.40 | -5.20 | 2.00E-07 | 4.24E-16 |
|    |              | S | 153 (12.03)          | 485 (25.21)          | 2.10 | 9.26  | 1.96E-20 |          |
| 11 | $\alpha$ 172 | E | 78 (6.13)            | 47 (2.44)            | 0.40 | -5.20 | 2.00E-07 | 4.24E-16 |
|    |              | K | 153 (12.03)          | 485 (25.21)          | 2.10 | 9.26  | 1.96E-20 |          |
| 12 | $\alpha$ 212 | F | 153 (12.03)          | 485 (25.21)          | 2.10 | 9.26  | 1.96E-20 | 4.24E-16 |
|    |              | L | 78 (6.13)            | 47 (2.44)            | 0.40 | -5.20 | 2.00E-07 |          |
| 13 | $\beta$ 135  | D | 153 (12.03)          | 485 (25.21)          | 2.10 | 9.26  | 1.96E-20 | 4.24E-16 |
|    |              | G | 78 (6.13)            | 47 (2.44)            | 0.40 | -5.20 | 2.00E-07 |          |

Table S2. Associations of identified DQ8/9 and DQ2 motifs with their respective aminoacids (top two row panels), together with their intersection and union of aminoacids (bottom two row panels), with six autoantibody levels (six column panels). In each panel, estimated frequencies and their percentages among those negative and positive autoantibody levels, estimated ratio of odds, Z score and p-value. P-values are highlighted green or red, if they are significantly positive or negative, respectively, at the significance level of 5%.

|                                           | IAA         |             |      |       |          | GADA        |             |      |       |          | IA2A        |             |      |       |          | ZnT8RA      |            |      |       |          | ZnT8WA      |             |      |       |          | ZnT8QA      |             |      |       |          |  |
|-------------------------------------------|-------------|-------------|------|-------|----------|-------------|-------------|------|-------|----------|-------------|-------------|------|-------|----------|-------------|------------|------|-------|----------|-------------|-------------|------|-------|----------|-------------|-------------|------|-------|----------|--|
|                                           | Neg (%)     | Pos (%)     | OR   | Z     | p        | Neg (%)     | Pos (%)     | OR   | Z     | p        | Neg (%)     | Pos (%)     | OR   | Z     | p        | Neg (%)     | Pos (%)    | OR   | Z     | p        | Neg (%)     | Pos (%)     | OR   | Z     | p        | Neg (%)     | Pos (%)     | OR   | Z     | p        |  |
| A) DQ8/9 Carriers                         |             |             |      |       |          |             |             |      |       |          |             |             |      |       |          |             |            |      |       |          |             |             |      |       |          |             |             |      |       |          |  |
| QAD                                       | 567 (43.35) | 271 (43.99) | 1.01 | 0.31  | 7.54E-01 | 351 (47.05) | 487 (41.34) | 0.88 | -2.90 | 3.70E-03 | 108 (28.72) | 730 (47.16) | 1.64 | 7.63  | 2.40E-14 | 373 (44.4)  | 465 (42.9) | 0.97 | -0.78 | 4.35E-01 | 385 (41.58) | 453 (45.39) | 1.09 | 1.99  | 4.68E-02 | 553 (43)    | 285 (44.67) | 1.04 | 0.82  | 4.12E-01 |  |
| QDD                                       | 13 (0.99)   | 16 (2.6)    | 2.61 | 2.71  | 6.65E-03 | 9 (1.21)    | 20 (1.7)    | 1.41 | 0.87  | 3.85E-01 | 5 (1.33)    | 24 (1.55)   | 1.17 | 0.32  | 7.51E-01 | 11 (1.31)   | 18 (1.66)  | 1.27 | 0.63  | 5.28E-01 | 15 (1.62)   | 14 (1.4)    | 0.87 | -0.39 | 6.94E-01 | 19 (1.48)   | 10 (1.57)   | 1.06 | 0.15  | 8.78E-01 |  |
| B) DQ2 Carriers                           |             |             |      |       |          |             |             |      |       |          |             |             |      |       |          |             |            |      |       |          |             |             |      |       |          |             |             |      |       |          |  |
| CAD                                       | 337 (25.76) | 148 (24.03) | 0.93 | -0.86 | 3.92E-01 | 140 (18.77) | 345 (29.29) | 1.56 | 5.41  | 6.35E-08 | 142 (37.77) | 343 (22.16) | 0.59 | -6.53 | 6.55E-11 | 227 (27.02) | 258 (23.8) | 0.88 | -1.69 | 9.17E-02 | 248 (26.78) | 237 (23.75) | 0.89 | -1.60 | 1.10E-01 | 345 (26.83) | 140 (21.94) | 0.82 | -2.43 | 1.53E-02 |  |
| KAG                                       | 28 (2.14)   | 13 (2.11)   | 0.99 | -0.04 | 9.65E-01 | 10 (1.34)   | 31 (2.63)   | 1.96 | 1.93  | 5.34E-02 | 6 (1.6)     | 35 (2.26)   | 1.42 | 0.81  | 4.18E-01 | 18 (2.14)   | 23 (2.12)  | 0.99 | -0.03 | 9.74E-01 | 21 (2.27)   | 20 (2)      | 0.88 | -0.40 | 6.86E-01 | 25 (1.94)   | 16 (2.51)   | 1.29 | 0.82  | 4.15E-01 |  |
| C) Carriers of either DQ8/9 , DQ2 or both |             |             |      |       |          |             |             |      |       |          |             |             |      |       |          |             |            |      |       |          |             |             |      |       |          |             |             |      |       |          |  |
| CAD                                       | 337 (25.76) | 148 (24.03) | 0.93 | -0.86 | 3.92E-01 | 140 (18.77) | 345 (29.29) | 1.56 | 5.41  | 6.35E-08 | 142 (37.77) | 343 (22.16) | 0.59 | -6.53 | 6.55E-11 | 227 (27.02) | 258 (23.8) | 0.88 | -1.69 | 9.17E-02 | 248 (26.78) | 237 (23.75) | 0.89 | -1.60 | 1.10E-01 | 345 (26.83) | 140 (21.94) | 0.82 | -2.43 | 1.53E-02 |  |
| KAG                                       | 28 (2.14)   | 13 (2.11)   | 0.99 | -0.04 | 9.65E-01 | 10 (1.34)   | 31 (2.63)   | 1.96 | 1.93  | 5.34E-02 | 6 (1.6)     | 35 (2.26)   | 1.42 | 0.81  | 4.18E-01 | 18 (2.14)   | 23 (2.12)  | 0.99 | -0.03 | 9.74E-01 | 21 (2.27)   | 20 (2)      | 0.88 | -0.40 | 6.86E-01 | 25 (1.94)   | 16 (2.51)   | 1.29 | 0.82  | 4.15E-01 |  |
| QAD                                       | 567 (43.35) | 271 (43.99) | 1.01 | 0.31  | 7.54E-01 | 351 (47.05) | 487 (41.34) | 0.88 | -2.90 | 3.70E-03 | 108 (28.72) | 730 (47.16) | 1.64 | 7.63  | 2.40E-14 | 373 (44.4)  | 465 (42.9) | 0.97 | -0.78 | 4.35E-01 | 385 (41.58) | 453 (45.39) | 1.09 | 1.99  | 4.68E-02 | 553 (43)    | 285 (44.67) | 1.04 | 0.82  | 4.12E-01 |  |
| QDD                                       | 13 (0.99)   | 16 (2.6)    | 2.61 | 2.71  | 6.65E-03 | 9 (1.21)    | 20 (1.7)    | 1.41 | 0.87  | 3.85E-01 | 5 (1.33)    | 24 (1.55)   | 1.17 | 0.32  | 7.51E-01 | 11 (1.31)   | 18 (1.66)  | 1.27 | 0.63  | 5.28E-01 | 15 (1.62)   | 14 (1.4)    | 0.87 | -0.39 | 6.94E-01 | 19 (1.48)   | 10 (1.57)   | 1.06 | 0.15  | 8.78E-01 |  |

Table S3. Three linkage-disequilibrium sets (LD set) present in both DQ8/9 and DQ2 clusters, and associated residues and their motifs

| Cluster | Lead        | Property         | $\alpha 22$ | $\alpha 23$ | $\alpha 31$ | $\alpha 37$ | $\alpha 44$ | $\alpha 47$ | $\alpha 48$ | $\alpha 49$ | $\alpha 50$ | $\alpha 51$ | $\alpha 53$ | $\alpha 54$ | $\alpha 72$ | $\alpha 73$ | $\alpha 104$ | $\alpha 153$ | $\alpha 158$ | $\alpha 160$ | $\alpha 172$ | $\alpha 184$ | $\alpha 212$ | $\beta 135$ |
|---------|-------------|------------------|-------------|-------------|-------------|-------------|-------------|-------------|-------------|-------------|-------------|-------------|-------------|-------------|-------------|-------------|--------------|--------------|--------------|--------------|--------------|--------------|--------------|-------------|
| DQ8/9   | $\alpha 44$ | C                |             |             |             |             |             |             |             |             |             |             |             |             |             |             |              |              |              |              |              |              |              |             |
|         |             | K resistant      | F           | T           |             |             | K           |             | H           |             | L           | F           | -           |             | L           |             |              |              |              |              |              |              | A            |             |
|         |             | Q risk           | Y           | S           |             |             | Q           |             | R           |             | F           | R           | F           |             | V           |             |              |              |              |              |              |              | T            |             |
| DQ2     | $\alpha 44$ | C risk           | Y           |             |             |             | C           |             | R           |             | F           |             |             |             |             |             |              |              |              |              |              |              |              |             |
|         |             | K resistant      | F           |             |             |             | K           |             | H           |             | L           |             |             |             |             |             |              |              |              |              |              |              |              |             |
|         |             | Q risk           | Y           |             |             |             | Q           |             | R           |             | F           |             |             |             |             |             |              |              |              |              |              |              |              |             |
| DQ2     | $\beta 135$ | D risk           |             |             | Q           | G           |             | V           | L           |             | Q           |             |             |             | S           |             | I            | L            | E            | S            | K            |              | F            | D           |
|         |             | G risk/resistant |             |             | E           | E           |             | L           | F           |             | R           |             |             |             | I           |             | T            | F            | D            | I            | E            |              | L            | G           |

LD set 1:  $\alpha 44$ ,  $\alpha 22$ ,  $\alpha 23$ ,  $\alpha 49$ ,  $\alpha 51$ ,  $\alpha 53$ ,  $\alpha 54$ ,  $\alpha 73$ ,  $\alpha 184$   
LD set 2:  $\alpha 22$ ,  $\alpha 44$ ,  $\alpha 49$ ,  $\alpha 51$   
LD set 3:  $\alpha 31$ ,  $\alpha 37$ ,  $\alpha 47$ ,  $\alpha 48$ ,  $\alpha 50$ ,  $\alpha 72$ ,  $\alpha 104$ ,  $\alpha 153$ ,  $\alpha 158$ ,  $\alpha 160$ ,  $\alpha 172$  and  $\alpha 212$
